# Supplementary figures and images for: Genomics-Based Reconstruction and Predictive Profiling of Amino Acid Biosynthesis in the Human Gut Microbiome
Source: MDPI journal article supplement (doi:10.3390/microorganisms10040740), 2022-03-30

### Phenotype variability (genus level)

3 Number of Variable Phenotypes (NVP)

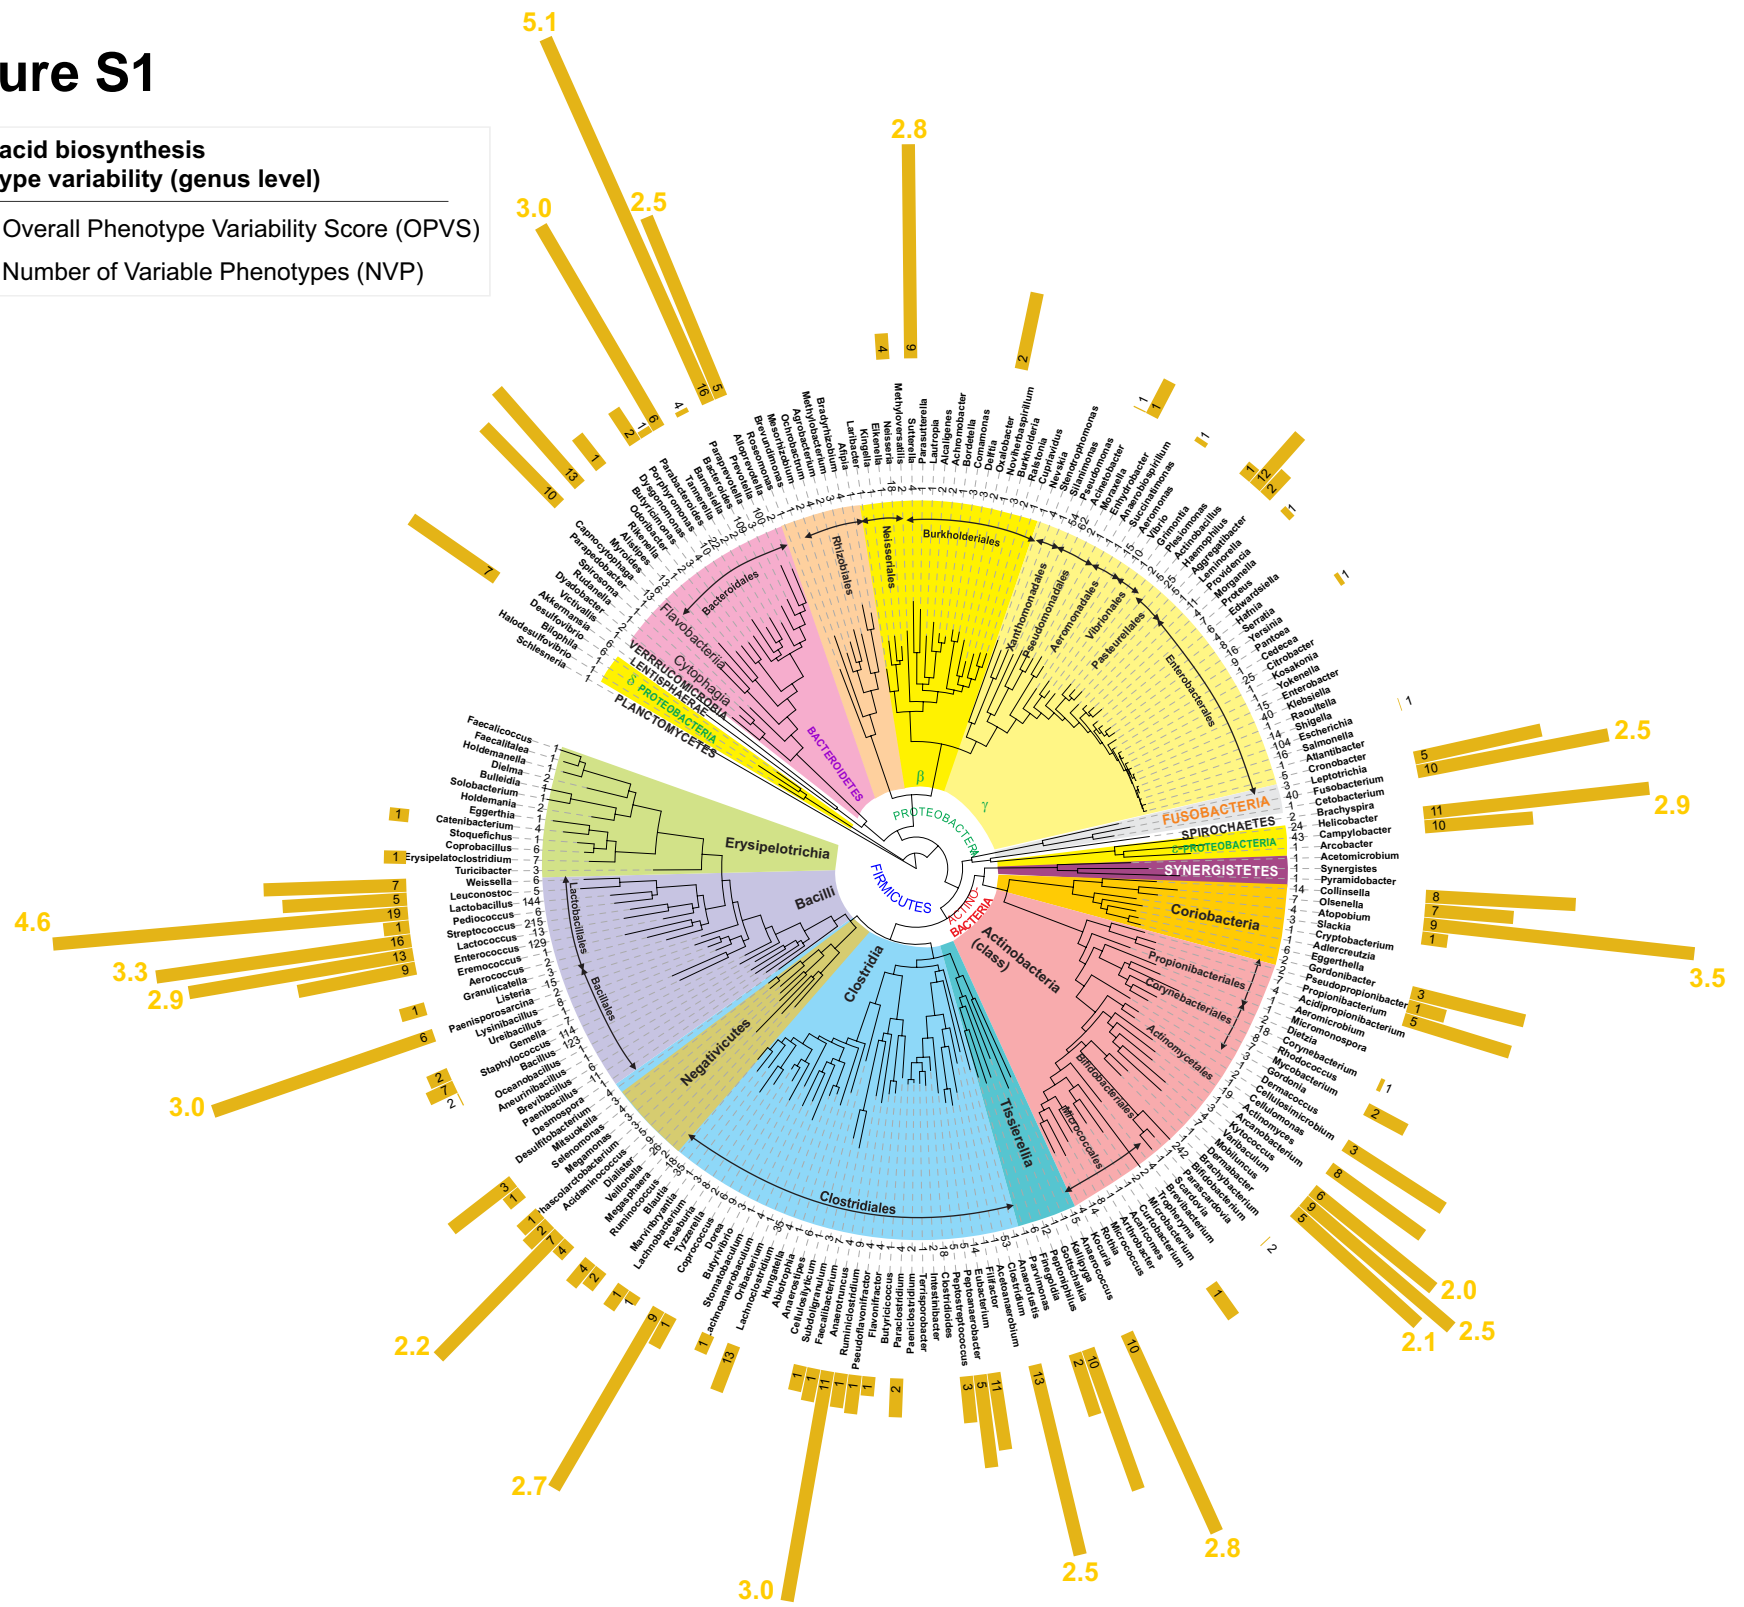

Supplement: s1 [file s1]

Figure S2

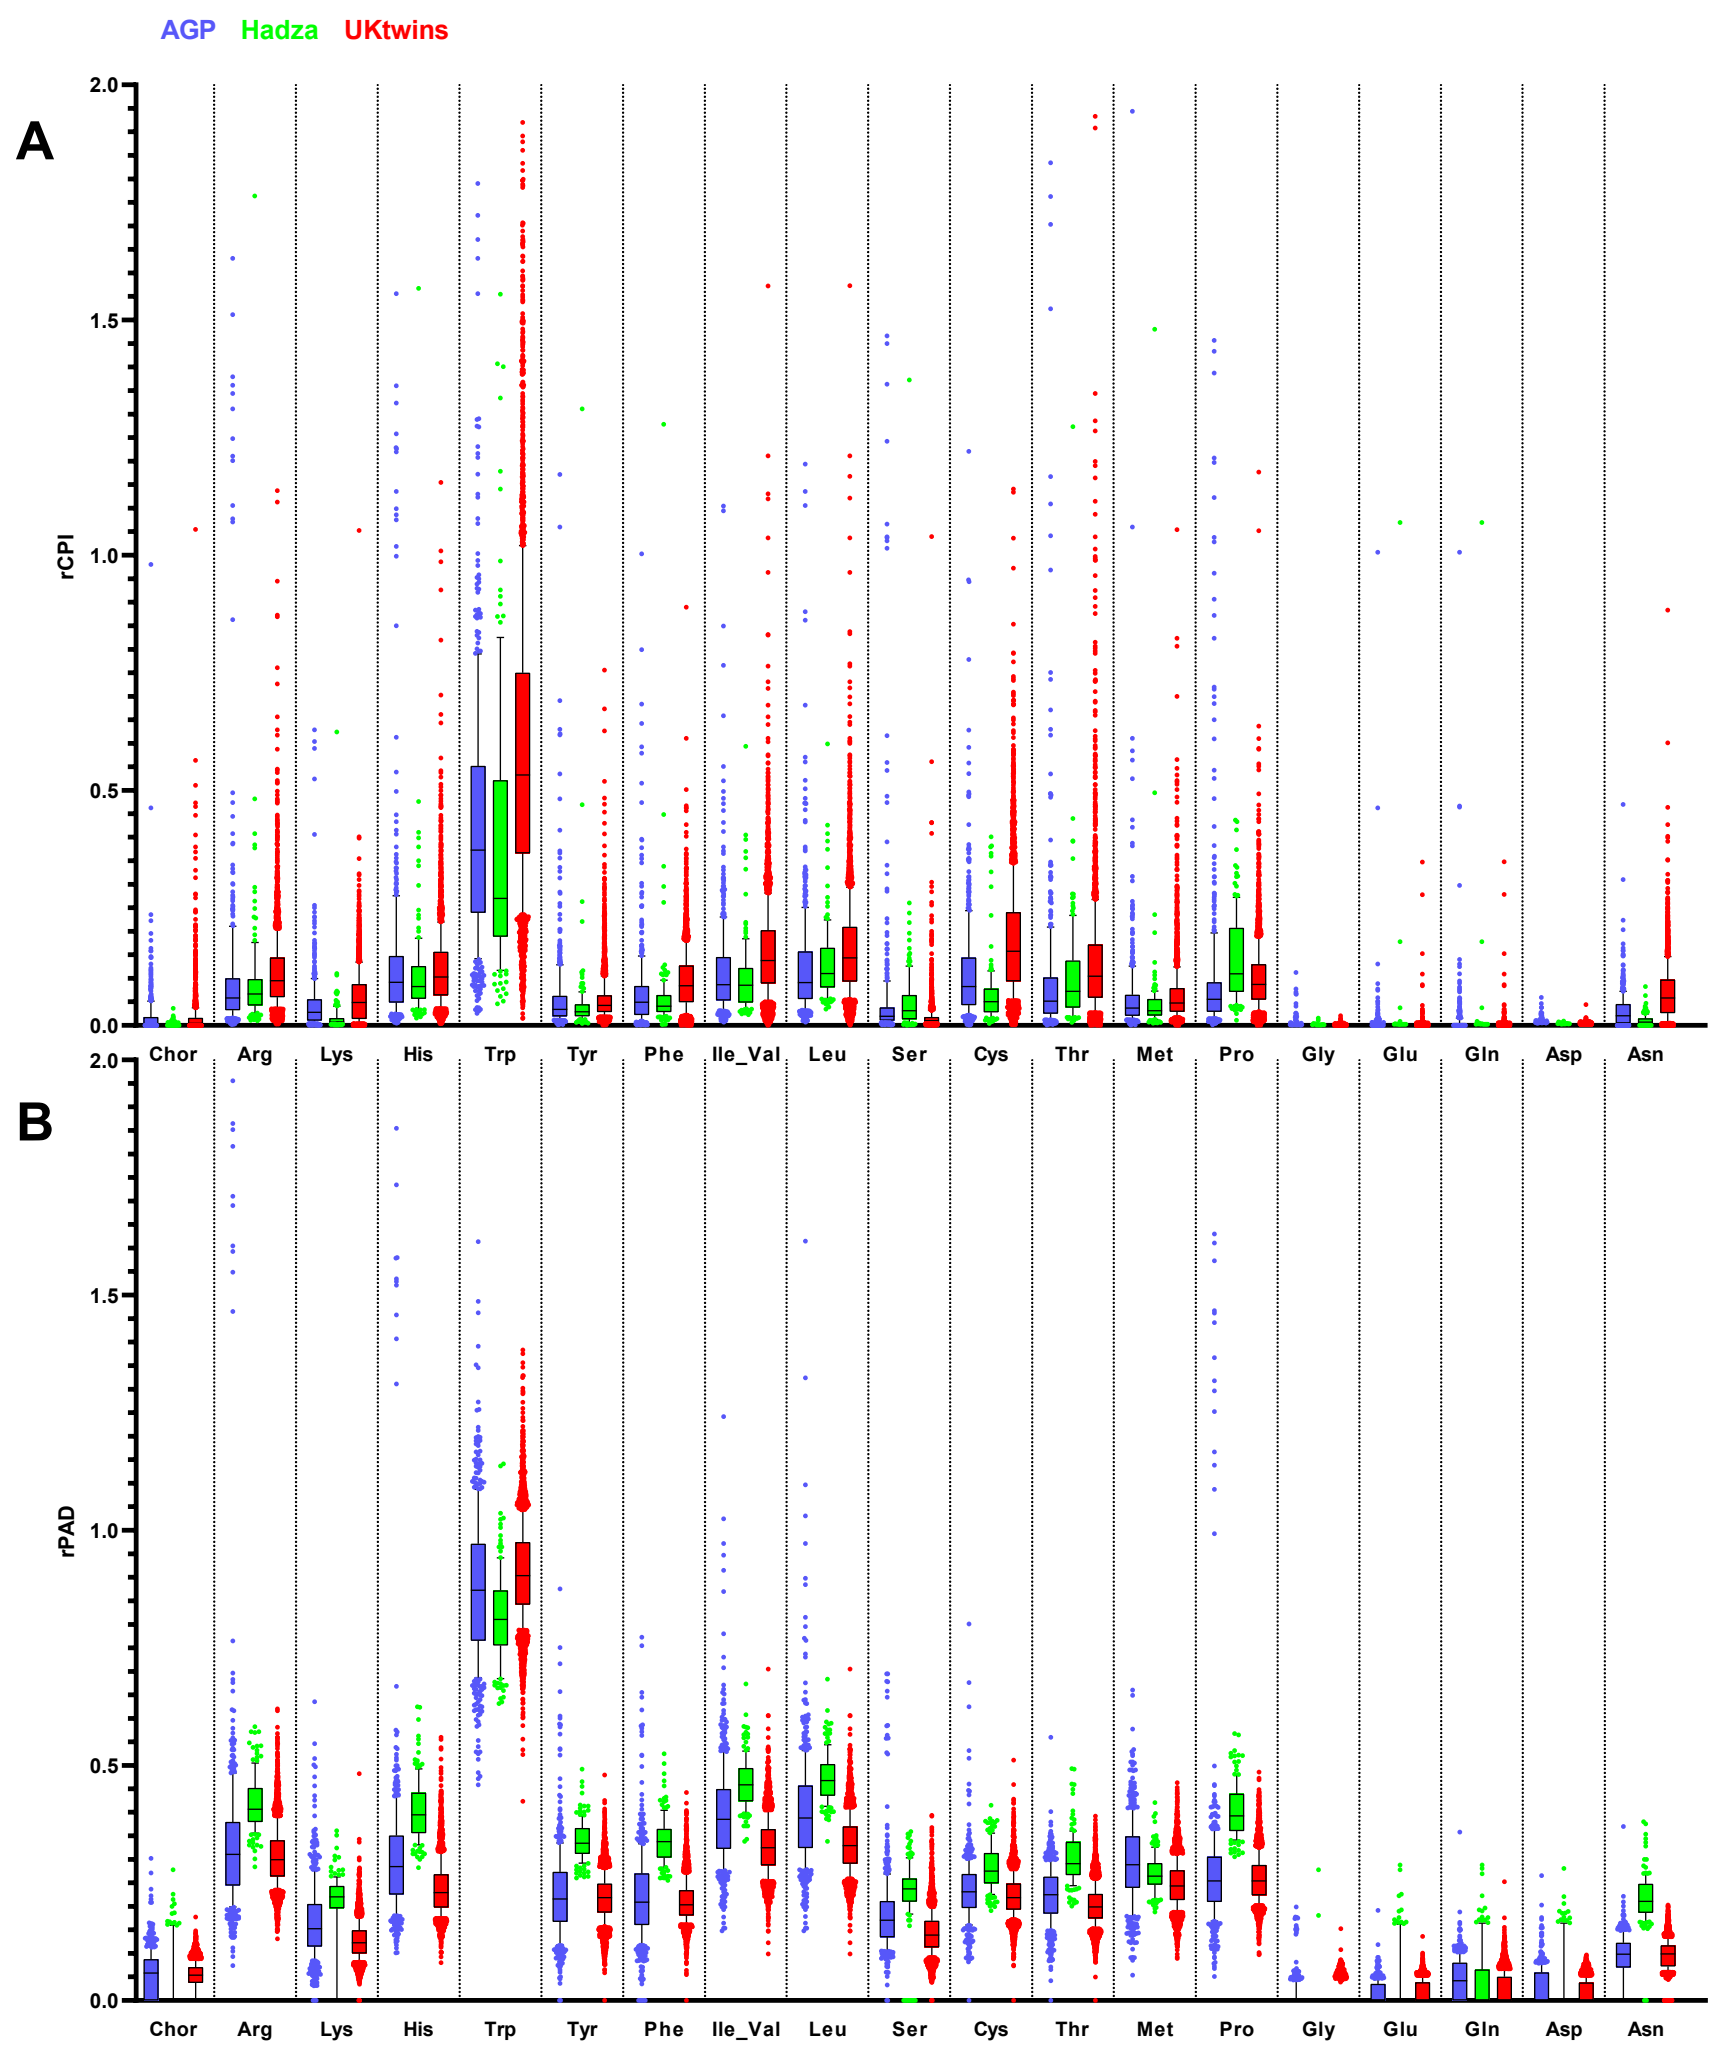

Supplement: s1 [file s1]
